# Supplementary material
Source: ML conference proceedings conference paper supplement (https://openaccess.thecvf.com/content/cvpr_2015/html/Sridhar_Fast_and_Robust_2015_CVPR_paper.html)
Supplement: Supplementary file 2 [file Sridhar_Fast_and_Robust_2015_CVPR_supplemental.zip]

Archive with 2 entries (2 files):
- 0123-supp.mp4
- 0123-supp.pdf
